# Supplementary material
Source: publisher figshare collection journal article supplement (https://sage.figshare.com/ndownloader/files/13612319)
Supplement: Supplementary file 1 [file 13612319]

## OPTIC Transition Tracking Tool (T3)

Unique Identifier:

\_\_\_\_\_

The T3 is a pilot-tested electronic data collection tool used to obtain case-related data about long-term care (LTC) residents during the emergency transition process. It is comprised of data elements from LTC, emergency transport and emergency department settings.

### Please cite this tool as:

Cummings GG, Reid RC, Cummings GE, Cooper SL, Abel S, Bissell LJ, Estabrooks CA, Rowe BH, Wagg A, Norton PG, Ertel M. (2013). OPTIC Transition Tracking Tool® (T3®).

### References on development and pilot testing:

Cummings GG, Reid RC, Estabrooks CA, Norton PG, Cummings GE, Rowe B, Abel, S, Bissell L, Bottorff J, Robinson CA, Wagg A, Lee J, Lynch S, Masaoud E. (2012). Older Persons' Transitions in Care (OPTIC): A study protocol. BMC Geriatrics, 12:75. doi: 10.1186/1471-2318-12-75, <http://www.biomedcentral.com/1471-2318/12/75>

Reid RC, Cummings GE, Cooper SL, Abel S, Bissell LJ, Estabrooks CA, Rowe BH, Wagg A, Norton PG, Ertel M, Cummings GG. (2013). The Older Persons' Transitions in Care (OPTIC) study: Pilot testing of the transition tracking tool. BMC Health Services Research, 13 (515). doi: 10.1186/1472-6963-13-515

## OPTIC Transition Tracking Tool (T3)

| <b>T3 TOOL - LTC Facility Tracking Sheet -1</b>                                                                                                                                                                                                                                                                                                                                                                          |                                                                                                                                                                                                                                                                                                                                                                                 |
|--------------------------------------------------------------------------------------------------------------------------------------------------------------------------------------------------------------------------------------------------------------------------------------------------------------------------------------------------------------------------------------------------------------------------|---------------------------------------------------------------------------------------------------------------------------------------------------------------------------------------------------------------------------------------------------------------------------------------------------------------------------------------------------------------------------------|
| Project Coordinator first found out about resident (dd/mm/yr): _____                                                                                                                                                                                                                                                                                                                                                     |                                                                                                                                                                                                                                                                                                                                                                                 |
| Date of data collection (dd/mm/yr): _____                                                                                                                                                                                                                                                                                                                                                                                |                                                                                                                                                                                                                                                                                                                                                                                 |
| <b>Data collected from charts, patient care records and EDIS (Edmonton)</b>                                                                                                                                                                                                                                                                                                                                              |                                                                                                                                                                                                                                                                                                                                                                                 |
| <b>I – Resident related information</b>                                                                                                                                                                                                                                                                                                                                                                                  |                                                                                                                                                                                                                                                                                                                                                                                 |
| 1. Sex of the resident: <input type="checkbox"/> Female <input type="checkbox"/> Male                                                                                                                                                                                                                                                                                                                                    |                                                                                                                                                                                                                                                                                                                                                                                 |
| <b>2. List resident's pre-existing diagnoses</b>                                                                                                                                                                                                                                                                                                                                                                         |                                                                                                                                                                                                                                                                                                                                                                                 |
| 3. Does the resident have publicly funded provincial health insurance?                                                                                                                                                                                                                                                                                                                                                   |                                                                                                                                                                                                                                                                                                                                                                                 |
| <input type="checkbox"/> Yes<br><input type="checkbox"/> No<br><input type="checkbox"/> Unknown/Not documented                                                                                                                                                                                                                                                                                                           |                                                                                                                                                                                                                                                                                                                                                                                 |
| <b>a) Which of the following supplemental health insurance plans does the resident have? (Check all that apply)</b><br><input type="checkbox"/> Publically funded provincial health<br>Additional plans:<br><input type="checkbox"/> Veteran's<br><input type="checkbox"/> Private (e.g. Blue Cross, Sunlife, etc). Specify: _____<br><input type="checkbox"/> Unknown<br><input type="checkbox"/> Other (specify) _____ |                                                                                                                                                                                                                                                                                                                                                                                 |
| 4. Does the resident have difficulty with any of the following? (Check all that apply)                                                                                                                                                                                                                                                                                                                                   |                                                                                                                                                                                                                                                                                                                                                                                 |
| <input type="checkbox"/> Developmental delay<br><input type="checkbox"/> Speech<br><input type="checkbox"/> Mobility<br><input type="checkbox"/> Vision<br><input type="checkbox"/> Activities of daily living<br><input type="checkbox"/> Language                                                                                                                                                                      | <input type="checkbox"/> Hearing<br><input type="checkbox"/> Needs physical restraint<br><input type="checkbox"/> Cognition<br><input type="checkbox"/> Level of consciousness<br><input type="checkbox"/> Psychiatric illness<br><input type="checkbox"/> Swallowing<br><input type="checkbox"/> Other, physical function (specify)<br><input type="checkbox"/> Not documented |
| 5. Does the resident have a legal substitute decision maker for healthcare decisions?                                                                                                                                                                                                                                                                                                                                    |                                                                                                                                                                                                                                                                                                                                                                                 |
| <input type="checkbox"/> Yes, go to questions 5a and b.<br><input type="checkbox"/> No, go to question 6<br><input type="checkbox"/> Not Documented                                                                                                                                                                                                                                                                      |                                                                                                                                                                                                                                                                                                                                                                                 |
| <b>a) If yes, who is this person? (Check all that apply)</b>                                                                                                                                                                                                                                                                                                                                                             |                                                                                                                                                                                                                                                                                                                                                                                 |
| <input type="checkbox"/> Wife<br><input type="checkbox"/> Son<br><input type="checkbox"/> Friend<br><input type="checkbox"/> Granddaughter<br><input type="checkbox"/> Nephew                                                                                                                                                                                                                                            | <input type="checkbox"/> Husband<br><input type="checkbox"/> Daughter<br><input type="checkbox"/> Grandson<br><input type="checkbox"/> Niece<br><input type="checkbox"/> Other (specify)<br><input type="checkbox"/> Not Documented                                                                                                                                             |

## T3 TOOL - LTC Facility Tracking Sheet -1

b) **Does this person reside in the same city as the resident?**

- ☐ Yes
- ☐ No
- ☐ Unknown

6. **Is there a next of kin named for this resident?**

- ☐ Yes, *go to question 6a.*
- ☐ No, *go to Section II.*
- ☐ Unknown, *go to Section II.*

a) **If yes, is this the same person as holds substitute decision-maker responsibility?**

- ☐ Yes
- ☐ No
- ☐ Unknown

☐ Notes \_\_\_\_\_

### **II – Facility Related Information**

1. **Has the resident been transferred to the ED from the long term care centre for health reasons in the last seven days?**

- ☐ Yes, (Hospital 1 or Hospital 2) when? (dd/mm/yr) \_\_\_\_\_ (time) \_\_\_\_\_
- ☐ Day (7:00-15:00) ☐ Evening (15:00-23:00) ☐ Night (23:00-7:00)
- ☐ No, *go to question 2*
- ☐ Yes, (other ED(s) in Edmonton)  
Please tick all emergency departments the resident has been transferred to in the last 7 days.
  - ☐ [Hospital A] Emergency Department
  - ☐ [Hospital B] Emergency Department
  - ☐ [Hospital C] Emergency Department
  - ☐ [Hospital D] Emergency Department
  - ☐ Community Health Centre (specify)

2. **How many times did a physician assess the resident's health in the 7 days prior to the transfer?**

- ☐ None
- ☐ One
- ☐ Two
- ☐ Three
- ☐ >3

3. **When was the resident last examined by a physician for reasons related to the transfer?**

(dd/mm/yr) \_\_\_\_\_ (time) \_\_\_\_\_

- ☐ Day (7:00-15:00) ☐ Evening (15:00-23:00) ☐ Night (23:00-7:00)
- ☐ Not assessed by physician

4. **How many times did a physician talk/fax with the long term care centre staff about the health of the resident in the 7 days prior to the transfer?**

- ☐ None
- ☐ One
- ☐ Two
- ☐ Three
- ☐ >3

☐ Notes \_\_\_\_\_

### **III – Transfer Related Information**

**Events in the last 7 days that led to the transfer (Check all that apply, state the most recent event time in each option):**

☐ Not documented

## T3 TOOL - LTC Facility Tracking Sheet -1

☐ Falls (dd/mm/yr): \_\_\_\_\_ (time) \_\_\_\_\_  
☐ Day (7:00-15:00) ☐ Evening (15:00-23:00) ☐ Night (23:00-7:00)

☐ Fractures (dd/mm/yr): \_\_\_\_\_ (time) \_\_\_\_\_  
☐ Day (7:00-15:00) ☐ Evening (15:00-23:00) ☐ Night (23:00-7:00)

☐ Aspiration pneumonia (dd/mm/yr): \_\_\_\_\_ (time) \_\_\_\_\_  
☐ Day (7:00-15:00) ☐ Evening (15:00-23:00) ☐ Night (23:00-7:00)

☐ Sudden change in physical condition in (dd/mm/yr): \_\_\_\_\_ (time) \_\_\_\_\_  
☐ Day (7:00-15:00) ☐ Evening (15:00-23:00) ☐ Night (23:00-7:00)

☐ Family request to send resident to hospital (dd/mm/yr): \_\_\_\_\_ (time) \_\_\_\_\_  
☐ Day (7:00-15:00) ☐ Evening (15:00-23:00) ☐ Night (23:00-7:00)

☐ Chest pain (dd/mm/yr): \_\_\_\_\_ (time) \_\_\_\_\_  
☐ Day (7:00-15:00) ☐ Evening (15:00-23:00) ☐ Night (23:00-7:00)

☐ Sepsis (dd/mm/yr): \_\_\_\_\_ (time) \_\_\_\_\_  
☐ Day (7:00-15:00) ☐ Evening (15:00-23:00) ☐ Night (23:00-7:00)

☐ Significant change in mental status (confusion) (dd/mm/yr): \_\_\_\_\_ (time) \_\_\_\_\_  
☐ Day (7:00-15:00) ☐ Evening (15:00-23:00) ☐ Night (23:00-7:00)

☐ Short of breath (SOB) (dd/mm/yr): \_\_\_\_\_ (time) \_\_\_\_\_  
☐ Day (7:00-15:00) ☐ Evening (15:00-23:00) ☐ Night (23:00-7:00)

☐ Inability to catheterize or replace existing catheter (dd/mm/yr): \_\_\_\_\_ (time) \_\_\_\_\_  
☐ Day (7:00-15:00) ☐ Evening (15:00-23:00) ☐ Night (23:00-7:00)

☐ Other (specify): \_\_\_\_\_ (dd/mm/yr): \_\_\_\_\_ (time) \_\_\_\_\_  
☐ Day (7:00-15:00) ☐ Evening (15:00-23:00) ☐ Night (23:00-7:00)

\_\_\_\_\_ (dd/mm/yr): \_\_\_\_\_ (time) \_\_\_\_\_  
☐ Day (7:00-15:00) ☐ Evening (15:00-23:00) ☐ Night (23:00-7:00)

\_\_\_\_\_ (dd/mm/yr): \_\_\_\_\_ (time) \_\_\_\_\_  
☐ Day (7:00-15:00) ☐ Evening (15:00-23:00) ☐ Night (23:00-7:00)

**2. Was a formal assessment of mental status documented? E.g. MMSE**

- ☐ Yes  
☐ No

**3. Was delirium documented?**

- ☐ Yes  
☐ No

**4. What were the trigger event(s) that led to the transfer of the resident? (Check no more than 3 options)**

- |                                                                                                                                                                                                                                       |                                                                                                                                                                                                                                                                             |
|---------------------------------------------------------------------------------------------------------------------------------------------------------------------------------------------------------------------------------------|-----------------------------------------------------------------------------------------------------------------------------------------------------------------------------------------------------------------------------------------------------------------------------|
| <input type="checkbox"/> Fall(s)<br><input type="checkbox"/> Aspiration pneumonia<br><input type="checkbox"/> Family/friend caregiver request<br><input type="checkbox"/> Sepsis<br><input type="checkbox"/> Inability to catheterize | <input type="checkbox"/> Fracture(s)<br><input type="checkbox"/> Sudden change in condition<br><input type="checkbox"/> Chest pain<br><input type="checkbox"/> Short of breath (SOB)<br><input type="checkbox"/> Other (specify)<br><input type="checkbox"/> Not documented |
|---------------------------------------------------------------------------------------------------------------------------------------------------------------------------------------------------------------------------------------|-----------------------------------------------------------------------------------------------------------------------------------------------------------------------------------------------------------------------------------------------------------------------------|

### T3 TOOL - LTC Facility Tracking Sheet -1

**5. Date and Time Emergency Medical Services or Inter-facility transfer (IFT/EMS) notified (dd/mm/yr):**

\_\_\_\_\_ (time) \_\_\_\_\_

- ☐ Day (7:00-15:00) ☐ Evening (15:00-23:00) ☐ Night (23:00-7:00)  
☐ Not documented

**6. Who made the call to notify IFT/EMS?**

- |                                                                                                                                                                                                                   |                                                                                                                                                                                     |
|-------------------------------------------------------------------------------------------------------------------------------------------------------------------------------------------------------------------|-------------------------------------------------------------------------------------------------------------------------------------------------------------------------------------|
| <input type="checkbox"/> His/her own physician<br><input type="checkbox"/> Licensed Practical Nurse (LPN)<br><input type="checkbox"/> Resident care manager<br><input type="checkbox"/> Other ( <i>specify</i> ): | <input type="checkbox"/> Registered Nurse (RN)<br><input type="checkbox"/> Nurse practitioner<br><input type="checkbox"/> Unit assistant<br><input type="checkbox"/> Not documented |
|-------------------------------------------------------------------------------------------------------------------------------------------------------------------------------------------------------------------|-------------------------------------------------------------------------------------------------------------------------------------------------------------------------------------|

**7. Who was involved in the decision to transfer? (Check all that apply)**

- |                                                                                                                                                                                                                                                           |                                                                                                                                                                                                                                                                        |
|-----------------------------------------------------------------------------------------------------------------------------------------------------------------------------------------------------------------------------------------------------------|------------------------------------------------------------------------------------------------------------------------------------------------------------------------------------------------------------------------------------------------------------------------|
| <input type="checkbox"/> Resident<br><input type="checkbox"/> Physician of record for the resident<br><input type="checkbox"/> Nurse practitioner<br><input type="checkbox"/> Resident Care Manager<br><input type="checkbox"/> Other ( <i>specify</i> ): | <input type="checkbox"/> Resident's family/friend caregiver<br><input type="checkbox"/> Registered Nurse (RN)<br><input type="checkbox"/> Licensed Practical Nurse (LPN)<br><input type="checkbox"/> Health Care Aide (HCA)<br><input type="checkbox"/> Not documented |
|-----------------------------------------------------------------------------------------------------------------------------------------------------------------------------------------------------------------------------------------------------------|------------------------------------------------------------------------------------------------------------------------------------------------------------------------------------------------------------------------------------------------------------------------|

**8. Who made the final decision to transfer?**

- |                                                                                                                                                                                                                                                           |                                                                                                                                                                                                                                                                        |
|-----------------------------------------------------------------------------------------------------------------------------------------------------------------------------------------------------------------------------------------------------------|------------------------------------------------------------------------------------------------------------------------------------------------------------------------------------------------------------------------------------------------------------------------|
| <input type="checkbox"/> Resident<br><input type="checkbox"/> Physician of record for the resident<br><input type="checkbox"/> Nurse practitioner<br><input type="checkbox"/> Resident Care Manager<br><input type="checkbox"/> Other ( <i>specify</i> ): | <input type="checkbox"/> Resident's family/friend caregiver<br><input type="checkbox"/> Registered Nurse (RN)<br><input type="checkbox"/> Licensed Practical Nurse (LPN)<br><input type="checkbox"/> Health Care Aide (HCA)<br><input type="checkbox"/> Not documented |
|-----------------------------------------------------------------------------------------------------------------------------------------------------------------------------------------------------------------------------------------------------------|------------------------------------------------------------------------------------------------------------------------------------------------------------------------------------------------------------------------------------------------------------------------|

**9. Was an attempt to contact the resident's physician made**

- ☐ prior to transfer?  
☐ post transfer?  
☐ Not documented

- ☐ Yes, when? (dd/mm/yr) \_\_\_\_\_ (time) \_\_\_\_\_, go to question 9a  
☐ Day (7:00-15:00) ☐ Evening (15:00-23:00) ☐ Night (23:00-7:00)  
☐ No, go to question 11.

**a) If yes, was the attempt to contact the resident's physician successful?**

- ☐ Yes, go to question 9b  
☐ No, go to question 11.  
☐ Not documented

**b) If yes, who contacted the resident's physician?**

- |                                                                                                                                                                                                         |                                                                                                                                                                 |
|---------------------------------------------------------------------------------------------------------------------------------------------------------------------------------------------------------|-----------------------------------------------------------------------------------------------------------------------------------------------------------------|
| <input type="checkbox"/> Resident's family/friend caregiver<br><input type="checkbox"/> Resident Care Manager<br><input type="checkbox"/> Nurse practitioner<br><input type="checkbox"/> Not documented | <input type="checkbox"/> Registered Nurse (RN)<br><input type="checkbox"/> Licensed Practical Nurse (LPN)<br><input type="checkbox"/> Other ( <i>specify</i> ): |
|---------------------------------------------------------------------------------------------------------------------------------------------------------------------------------------------------------|-----------------------------------------------------------------------------------------------------------------------------------------------------------------|

**10. Did the physician order any of the following? (Check all that apply)**

- |                                                                                                                                                                               |                                                                                                                                                                                                       |
|-------------------------------------------------------------------------------------------------------------------------------------------------------------------------------|-------------------------------------------------------------------------------------------------------------------------------------------------------------------------------------------------------|
| <input type="checkbox"/> Transfer<br><input type="checkbox"/> Assessment by professional health care providers other than LTC personnel<br><input type="checkbox"/> IV access | <input type="checkbox"/> Assessment by physician or designated nurse or nurse practitioner<br><input type="checkbox"/> Oxygen (O <sub>2</sub> )<br><input type="checkbox"/> Other ( <i>specify</i> ): |
|-------------------------------------------------------------------------------------------------------------------------------------------------------------------------------|-------------------------------------------------------------------------------------------------------------------------------------------------------------------------------------------------------|

## T3 TOOL - LTC Facility Tracking Sheet -1

|                                                                                                                                                                                                                                                                                                                                                                                                                                                                                                                                                                                                                                                                                                                    |                                                                                                                                                                                                                                                                          |
|--------------------------------------------------------------------------------------------------------------------------------------------------------------------------------------------------------------------------------------------------------------------------------------------------------------------------------------------------------------------------------------------------------------------------------------------------------------------------------------------------------------------------------------------------------------------------------------------------------------------------------------------------------------------------------------------------------------------|--------------------------------------------------------------------------------------------------------------------------------------------------------------------------------------------------------------------------------------------------------------------------|
|                                                                                                                                                                                                                                                                                                                                                                                                                                                                                                                                                                                                                                                                                                                    | <input type="checkbox"/> Not documented<br><input type="checkbox"/> None of the above                                                                                                                                                                                    |
| <b>11. Was an attempt made to contact the next of kin or legal substitute decision maker to notify them about the transfer?</b><br><input type="checkbox"/> Yes, when? (dd/mm/yr) _____ (time) _____, go to question 11a.<br><input type="checkbox"/> Day (7:00-15:00) <input type="checkbox"/> Evening (15:00-23:00) <input type="checkbox"/> Night (23:00-7:00)<br><br><input type="checkbox"/> No, go to question 12.<br><input type="checkbox"/> Not documented<br><input type="checkbox"/> Not applicable since no family / caregiver, go to question 12.<br><br><b>a) If yes, was successful contact recorded in the patient care record?</b><br><input type="checkbox"/> Yes<br><input type="checkbox"/> No |                                                                                                                                                                                                                                                                          |
| <b>12. What are the last two recent documented Cognitive Performance Scores (CPS) for the resident?</b>                                                                                                                                                                                                                                                                                                                                                                                                                                                                                                                                                                                                            |                                                                                                                                                                                                                                                                          |
| <b>Most recent CPS:</b>                                                                                                                                                                                                                                                                                                                                                                                                                                                                                                                                                                                                                                                                                            | When assessed? (dd/mm/yr) _____<br><input type="checkbox"/> Not recorded                                                                                                                                                                                                 |
| <b>2<sup>nd</sup> recent CPS:</b>                                                                                                                                                                                                                                                                                                                                                                                                                                                                                                                                                                                                                                                                                  | When assessed? (dd/mm/yr) _____<br><input type="checkbox"/> Not recorded                                                                                                                                                                                                 |
| <b>13. Does the resident have an Advance Directive in place?</b><br><input type="checkbox"/> Yes (dd/mm/yr) _____<br><input type="checkbox"/> No                                                                                                                                                                                                                                                                                                                                                                                                                                                                                                                                                                   |                                                                                                                                                                                                                                                                          |
| <b>14. Does the resident have a “do not resuscitate” (DNR) order in place?</b><br><input type="checkbox"/> Yes<br><input type="checkbox"/> No                                                                                                                                                                                                                                                                                                                                                                                                                                                                                                                                                                      |                                                                                                                                                                                                                                                                          |
| <b>15. What documentation was sent with the resident? (Check all that apply)</b>                                                                                                                                                                                                                                                                                                                                                                                                                                                                                                                                                                                                                                   |                                                                                                                                                                                                                                                                          |
| <input type="checkbox"/> Patient Care Plan<br><input type="checkbox"/> DNR order<br><input type="checkbox"/> Record of allergy<br><input type="checkbox"/> Other ( <i>specify</i> ): _____                                                                                                                                                                                                                                                                                                                                                                                                                                                                                                                         | <input type="checkbox"/> Advance Directive<br><input type="checkbox"/> Medication list<br><input type="checkbox"/> Patient summary leading to transfer<br><input type="checkbox"/> Patient Transfer Information Sheet<br><input type="checkbox"/> N/A, no documents sent |
| <b>16. Which belongings accompanied the resident? (Check all that apply)</b>                                                                                                                                                                                                                                                                                                                                                                                                                                                                                                                                                                                                                                       |                                                                                                                                                                                                                                                                          |
| <input type="checkbox"/> Not recorded<br><input type="checkbox"/> Clothing<br><input type="checkbox"/> Medications<br><input type="checkbox"/> Slippers<br><input type="checkbox"/> Hearing aid<br><input type="checkbox"/> Other ( <i>specify</i> ): _____                                                                                                                                                                                                                                                                                                                                                                                                                                                        | <input type="checkbox"/> Glasses<br><input type="checkbox"/> Dentures<br><input type="checkbox"/> Health care card<br><input type="checkbox"/> Cane/Walker<br><input type="checkbox"/> Jewellery                                                                         |
| <input type="checkbox"/> Notes _____                                                                                                                                                                                                                                                                                                                                                                                                                                                                                                                                                                                                                                                                               |                                                                                                                                                                                                                                                                          |
| <b>IV- Data collected from quality perception questions Asked of the Sending Long Term Care RN</b>                                                                                                                                                                                                                                                                                                                                                                                                                                                                                                                                                                                                                 |                                                                                                                                                                                                                                                                          |
| <input type="checkbox"/> Declined to participate<br><input type="checkbox"/> Could not re-call the transfer<br><input type="checkbox"/> Unable to contact/locate HCP                                                                                                                                                                                                                                                                                                                                                                                                                                                                                                                                               |                                                                                                                                                                                                                                                                          |
| <b>1. Do you think the transfer could have been avoided?</b><br><input type="checkbox"/> Yes, go to question 1a<br><input type="checkbox"/> No, go to question 2                                                                                                                                                                                                                                                                                                                                                                                                                                                                                                                                                   |                                                                                                                                                                                                                                                                          |

## T3 TOOL - LTC Facility Tracking Sheet -1

a) If yes, what do you think could have been done to avoid the transfer?

- |                                                                                                                                                                                                                                                                                                                                            |                                                                                                                                                                                                            |
|--------------------------------------------------------------------------------------------------------------------------------------------------------------------------------------------------------------------------------------------------------------------------------------------------------------------------------------------|------------------------------------------------------------------------------------------------------------------------------------------------------------------------------------------------------------|
| <input type="checkbox"/> Access to required equipment<br><input type="checkbox"/> Access to adequate resources (e.g. staffing levels, Information [i.e. knowing the resident well enough/having enough information to determine their need for care])<br><input type="checkbox"/> Family not insisting on transfer to emergency department | <input type="checkbox"/> Access to required services<br><input type="checkbox"/> Dr. examine the resident while still in the long term care centre<br><input type="checkbox"/> Other(s) ( <i>specify</i> ) |
|--------------------------------------------------------------------------------------------------------------------------------------------------------------------------------------------------------------------------------------------------------------------------------------------------------------------------------------------|------------------------------------------------------------------------------------------------------------------------------------------------------------------------------------------------------------|

**Please state how much you agree or disagree with the following statements:**

**2. The transport team or person listened carefully to your report.**

|                            |                            |                            |                            |                            |
|----------------------------|----------------------------|----------------------------|----------------------------|----------------------------|
| Strongly Agree             | Agree                      | Neutral                    | Disagree                   | Strongly Disagree          |
| <input type="checkbox"/> 1 | <input type="checkbox"/> 2 | <input type="checkbox"/> 3 | <input type="checkbox"/> 4 | <input type="checkbox"/> 5 |

**3. The transport team or person listened respectfully to your report.**

|                            |                            |                            |                            |                            |
|----------------------------|----------------------------|----------------------------|----------------------------|----------------------------|
| Strongly Agree             | Agree                      | Neutral                    | Disagree                   | Strongly Disagree          |
| <input type="checkbox"/> 1 | <input type="checkbox"/> 2 | <input type="checkbox"/> 3 | <input type="checkbox"/> 4 | <input type="checkbox"/> 5 |

**4. You had a meaningful exchange of information about the reason for transfer with the transport people. (Prompt: conversation)**

|                            |                            |                            |                            |                            |
|----------------------------|----------------------------|----------------------------|----------------------------|----------------------------|
| Strongly Agree             | Agree                      | Neutral                    | Disagree                   | Strongly Disagree          |
| <input type="checkbox"/> 1 | <input type="checkbox"/> 2 | <input type="checkbox"/> 3 | <input type="checkbox"/> 4 | <input type="checkbox"/> 5 |

☐ Notes \_\_\_\_\_

**T3 TOOL - IFT/EMS<sup>1</sup> Tracking Sheet -1**

Date of data collection (dd/mm/yr): \_\_\_\_\_

**Data collected from charts, patient care records and EDIS (Edmonton)**

**I – Resident related information**

**1. Chief complaint:**

**2. Which belongings accompanied the resident? (Check all that apply)**

- |                                           |                                           |
|-------------------------------------------|-------------------------------------------|
| <input type="checkbox"/> Not recorded     | <input type="checkbox"/> Glasses          |
| <input type="checkbox"/> Clothing         | <input type="checkbox"/> Dentures         |
| <input type="checkbox"/> Medications      | <input type="checkbox"/> Health care card |
| <input type="checkbox"/> Slippers         | <input type="checkbox"/> Cane/Walker      |
| <input type="checkbox"/> Hearing aid      | <input type="checkbox"/> Jewellery        |
| <input type="checkbox"/> Other (specify): |                                           |

**3. Were the Medical /Surgical History and/or physical exam recorded on the Patient Care Record (PCR) by EMS staff?**

- |                                             |                                  |
|---------------------------------------------|----------------------------------|
| <input type="checkbox"/> History only       | <input type="checkbox"/> Both    |
| <input type="checkbox"/> Physical exam only | <input type="checkbox"/> Neither |

**4. Was the list of medications on EMS1 Patient Care Report (PCR) the same as the list of medications provided by long term care centre (LTC)?**

- ☐ Yes, go to question 5.  
☐ No, go to question 4a  
☐ N/A no medication list provided by LTC.

a) If no, what is the discrepancy? (Specify):

**5. Was there any change in resident condition between LTC and Emergency Department (ED) recorded on PCR?**

- ☐ Yes (specify)  
☐ No  
☐ Notes \_\_\_\_\_

**II – IFT/EMS Pre-hospital setting and transfer related information**

**1. Was documentation prepared by LTC passed on to IFT/EMS?**

- ☐ Yes, go to question 1a.  
☐ No, go to question 2.

a) If yes, which documentation was included? (Check all that apply)

- |                                            |                                                              |
|--------------------------------------------|--------------------------------------------------------------|
| <input type="checkbox"/> Patient Care Plan | <input type="checkbox"/> Advance Directive                   |
| <input type="checkbox"/> DNR order         | <input type="checkbox"/> Medication list                     |
| <input type="checkbox"/> Record of Allergy | <input type="checkbox"/> Patient summary leading to transfer |
| <input type="checkbox"/> Other (specify):  | <input type="checkbox"/> Patient Transfer Information Sheet  |

**2. Highest level of responding IFT/EMS Personnel**

- ☐ Paramedic    ☐ EMT    ☐ EMR    ☐ PCP    ☐ ACP    ☐ ACP-R    ☐ ACP-S  
☐ CCP    ☐ PCP-S    ☐ ITT    ☐ RN

**3. What level of EMS service was provided?**

- |                                                        |                                                           |
|--------------------------------------------------------|-----------------------------------------------------------|
| <input type="checkbox"/> Inter-facility transfer (IFT) | <input type="checkbox"/> Emergency Medical Services (EMS) |
| <input type="checkbox"/> Undocumented                  | <input type="checkbox"/> Other (specify):                 |



## T3 TOOL - IFT/EMS<sup>1</sup> Tracking Sheet -1

### 4. Number of responding IFT/EMS/MV Personnel

- ☐ One  
☐ Two  
☐ Not documented

### 5. What barriers did the resident experience to patient care? (Check all that apply)

- |                                                                                                                                                                                                                                                                      |                                                                                                                                                                                                                                                                      |
|----------------------------------------------------------------------------------------------------------------------------------------------------------------------------------------------------------------------------------------------------------------------|----------------------------------------------------------------------------------------------------------------------------------------------------------------------------------------------------------------------------------------------------------------------|
| <input type="checkbox"/> Developmentally Impaired<br><input type="checkbox"/> Hearing Deficit<br><input type="checkbox"/> Intoxicated<br><input type="checkbox"/> Language<br><input type="checkbox"/> Physical Deficit<br><input type="checkbox"/> Other (specify): | <input type="checkbox"/> Physically Restrained<br><input type="checkbox"/> Speech Deficit<br><input type="checkbox"/> Unattended or unsupervised<br><input type="checkbox"/> Unconscious<br><input type="checkbox"/> None<br><input type="checkbox"/> Not documented |
|----------------------------------------------------------------------------------------------------------------------------------------------------------------------------------------------------------------------------------------------------------------------|----------------------------------------------------------------------------------------------------------------------------------------------------------------------------------------------------------------------------------------------------------------------|

### 6. Was the PCR form handed over to the Emergency Department (ED)?

- ☐ Yes  
☐ No

### 7. Was documentation prepared by LTC passed on to ED?

- ☐ Yes, go to question 7a.  
☐ No, go to question 8.

#### a) If yes, which documentation was included? (Check all that apply)

- |                                                                                                                                                                                                                 |                                                                                                                                                                                                                       |
|-----------------------------------------------------------------------------------------------------------------------------------------------------------------------------------------------------------------|-----------------------------------------------------------------------------------------------------------------------------------------------------------------------------------------------------------------------|
| <input type="checkbox"/> Patient Care Plan<br><input type="checkbox"/> DNR order<br><input type="checkbox"/> Record of Allergy<br><input type="checkbox"/> PCR form<br><input type="checkbox"/> Other(specify): | <input type="checkbox"/> Advance Directive<br><input type="checkbox"/> Medication list<br><input type="checkbox"/> Patient summary leading to transfer<br><input type="checkbox"/> Patient Transfer Information Sheet |
|-----------------------------------------------------------------------------------------------------------------------------------------------------------------------------------------------------------------|-----------------------------------------------------------------------------------------------------------------------------------------------------------------------------------------------------------------------|

### 8. The resident's Canadian Triage Acuity Score (CTAS) (Check one)

Level    I        II        III        IV        V

### 9. Who assigned the CTAS score?

- ☐ RN  
☐ EMS  
☐ Notes \_\_\_\_\_

### III- Transfer-time related information

1- **Time of notification from LTC** (dd/mm/yr): \_\_\_\_\_ (time) \_\_\_\_\_

- ☐ Not documented

2- **Arrival of IFT/EMS/MV at LTC** (dd/mm/yr): \_\_\_\_\_ (time) \_\_\_\_\_

- ☐ Not documented

3- **EMS/IFT/MV Departure from the LTC** (dd/mm/yr): \_\_\_\_\_ (time) \_\_\_\_\_

- ☐ Not documented

4- **EMS/IFT/MV Arrival at ED** (dd/mm/yr): \_\_\_\_\_ (time) \_\_\_\_\_

- ☐ Not documented

### 5) Was there a transfer(s) from the transporting EMS crew to other EMS personnel in the ED?

- ☐ Yes, go to question 5a.  
☐ No, go to section IV.

a) If yes, how many?                      At what times?

## T3 TOOL - IFT/EMS<sup>1</sup> Tracking Sheet -1

(dd/mm/yr) \_\_\_\_\_ (time) \_\_\_\_\_

(dd/mm/yr) \_\_\_\_\_ (time) \_\_\_\_\_

☐ Notes \_\_\_\_\_

### IV- Data collected from Quality Perception Questions Asked of one of the EMS/IFT Responders

- ☐ Declined to participate
- ☐ Could not recall transfer
- ☐ Unable to contact/locate HCP

#### 1. Do you think the transfer could have been avoided?

- ☐ Yes, go to question 1a.
- ☐ No, go to question 2.

a) If yes, what do you think could have been done to avoid the transfer? (Check all that apply)

- |                                                                                                                                                                                                                                                                                                                                                                                                          |                                                                                                                                                                                                                                                                  |
|----------------------------------------------------------------------------------------------------------------------------------------------------------------------------------------------------------------------------------------------------------------------------------------------------------------------------------------------------------------------------------------------------------|------------------------------------------------------------------------------------------------------------------------------------------------------------------------------------------------------------------------------------------------------------------|
| <ul style="list-style-type: none"> <li><input type="checkbox"/> Access to required equipment</li> <li><input type="checkbox"/> Access to adequate resources (e.g. staffing levels, information [i.e. knowing the resident well enough/having enough information to determine their need for care])</li> <li><input type="checkbox"/> Family not insisting on transfer to emergency department</li> </ul> | <ul style="list-style-type: none"> <li><input type="checkbox"/> Access to required services</li> <li><input type="checkbox"/> Dr. examine the resident while still in the long term care centre</li> <li><input type="checkbox"/> Other(s) (specify):</li> </ul> |
|----------------------------------------------------------------------------------------------------------------------------------------------------------------------------------------------------------------------------------------------------------------------------------------------------------------------------------------------------------------------------------------------------------|------------------------------------------------------------------------------------------------------------------------------------------------------------------------------------------------------------------------------------------------------------------|

### Please state how much you agree or disagree with the following statements.

#### 2. You received sufficient written information to provide care for the resident during transfer to the emergency department.

|                            |                            |                            |                            |                            |
|----------------------------|----------------------------|----------------------------|----------------------------|----------------------------|
| Strongly Agree             | Agree                      | Neutral                    | Disagree                   | Strongly Disagree          |
| <input type="checkbox"/> 1 | <input type="checkbox"/> 2 | <input type="checkbox"/> 3 | <input type="checkbox"/> 4 | <input type="checkbox"/> 5 |

#### 3. You received sufficient verbal information to provide care for the resident during transfer to the emergency department.

|                            |                            |                            |                            |                            |
|----------------------------|----------------------------|----------------------------|----------------------------|----------------------------|
| Strongly Agree             | Agree                      | Neutral                    | Disagree                   | Strongly Disagree          |
| <input type="checkbox"/> 1 | <input type="checkbox"/> 2 | <input type="checkbox"/> 3 | <input type="checkbox"/> 4 | <input type="checkbox"/> 5 |

#### 4. You were clear on the exact nature of the resident's condition based on all the communication provided.

|                            |                            |                            |                            |                            |
|----------------------------|----------------------------|----------------------------|----------------------------|----------------------------|
| Strongly Agree             | Agree                      | Neutral                    | Disagree                   | Strongly Disagree          |
| <input type="checkbox"/> 1 | <input type="checkbox"/> 2 | <input type="checkbox"/> 3 | <input type="checkbox"/> 4 | <input type="checkbox"/> 5 |

☐ Notes \_\_\_\_\_

## T3 TOOL - ED Tracking Sheet

Date of data collection (dd/mm/yr): \_\_\_\_\_

### Data collected from charts, patient care records and EDIS (Edmonton)

#### I – Resident related information

##### 1. Chief (Presenting) complaint:

☐ Not Documented

☐ Notes \_\_\_\_\_

#### II – Emergency Department Setting and transfer related information

##### 1. Was documentation prepared by LTC and IFT/EMS passed on to ED?

☐ Yes, go to question 1a and b.

☐ No, go to question 2.

##### a) If yes, which documentation was included? (Check all that apply)

☐ Patient Care Plan

☐ DNR order

☐ Record of Allergy

☐ PCR form

☐ Other (specify):

☐ Advance Directive

☐ Medication list

☐ Patient summary leading to transfer

☐ Advanced Fax report

☐ Patient Transfer Information Sheet

##### b) If yes, did the documentation include the following? (Check all that apply)

☐ Resident's baseline cognitive function

☐ Resident's communication ability

☐ Resident's Advance Directives For level of care

☐ Resident's vital signs at the time of the complaint

☐ Resident's medication list

☐ DNR

☐ None

##### 2. Which belongings accompanied the resident? (Check all that apply)

☐ Not recorded

☐ Clothing

☐ Medications

☐ Slippers

☐ Hearing aid

☐ Other (specify):

☐ Glasses

☐ Dentures

☐ Health care card

☐ Cane/Walker

☐ Jewellery

##### 3. Was the nursing assessment done?

☐ Yes, when? (dd/mm/yr): \_\_\_\_\_ (time) \_\_\_\_\_

☐ No

##### 4. Was a formal assessment of mental state documented? E.g. MMSE

☐ Yes

☐ No

##### 5. Was delirium documented?

☐ Yes

☐ No

## T3 TOOL - ED Tracking Sheet

### 6. Date and time the Doctor electronically signed up for resident.

(dd/mm/yr): \_\_\_\_\_ (time) \_\_\_\_\_

☐ Not Documented

### 7. Were the ED physician's history and examination details recorded?

☐ Yes, when? (dd/mm/yr): \_\_\_\_\_ (time) \_\_\_\_\_

☐ No

☐ Time Not Recorded

### 8. Did the ED physician order another consultant to see the resident?

☐ Yes, go to question 8a.

☐ No, go to question 10.

#### a) If yes, which consulting services?

- ☐ Internal Medicine (dd/mm/yr): \_\_\_\_\_ (time) \_\_\_\_\_ ☐ Time not record
- ☐ Social Worker (dd/mm/yr): \_\_\_\_\_ (time) \_\_\_\_\_ ☐ Time not record
- ☐ Surgery (dd/mm/yr): \_\_\_\_\_ (time) \_\_\_\_\_ ☐ Time not record
- ☐ Pastoral Care (dd/mm/yr): \_\_\_\_\_ (time) \_\_\_\_\_ ☐ Time not record
- ☐ Pulmonary/Respirologist (dd/mm/yr): \_\_\_\_\_ (time) \_\_\_\_\_ ☐ Time not recorded
- ☐ Occupational Therapy/Physiotherapy (dd/mm/yr): \_\_\_\_\_ (time) \_\_\_\_\_ ☐ Time not recorded
- ☐ Palliative (dd/mm/yr): \_\_\_\_\_ (time) \_\_\_\_\_ ☐ Time not record
- ☐ Trauma services (dd/mm/yr): \_\_\_\_\_ (time) \_\_\_\_\_ ☐ Time not record
- ☐ Stroke services (dd/mm/yr): \_\_\_\_\_ (time) \_\_\_\_\_ ☐ Time not record
- ☐ Cardiology (dd/mm/yr): \_\_\_\_\_ (time) \_\_\_\_\_ ☐ Time not record
- ☐ Neurosurgery (dd/mm/yr): \_\_\_\_\_ (time) \_\_\_\_\_ ☐ Time not record
- ☐ Orthopaedics (dd/mm/yr): \_\_\_\_\_ (time) \_\_\_\_\_ ☐ Time not record
- ☐ Intensive Care (dd/mm/yr): \_\_\_\_\_ (time) \_\_\_\_\_ ☐ Time not record
- ☐ Gerontology (dd/mm/yr): \_\_\_\_\_ (time) \_\_\_\_\_ ☐ Time not record
- ☐ Transition Nurse/Discharge Planner (dd/mm/yr): \_\_\_\_\_ (time) \_\_\_\_\_ ☐ Time not recorded
- ☐ Other (specify): (dd/mm/yr): \_\_\_\_\_ (time) \_\_\_\_\_ ☐ Time not record

### 9. What was the actual date and time the consultant examined the resident

- ☐ Internal Medicine (dd/mm/yr): \_\_\_\_\_ (time) \_\_\_\_\_ ☐ Time not recorded
- ☐ Social Worker (dd/mm/yr): \_\_\_\_\_ (time) \_\_\_\_\_ ☐ Time not recorded
- ☐ Surgery (dd/mm/yr): \_\_\_\_\_ (time) \_\_\_\_\_ ☐ Time not recorded
- ☐ Pastoral Care (dd/mm/yr): \_\_\_\_\_ (time) \_\_\_\_\_ ☐ Time not recorded
- ☐ Pulmonary/Respirologist (dd/mm/yr): \_\_\_\_\_ (time) \_\_\_\_\_ ☐ Time not recorded
- ☐ Occupational Therapy/Physiotherapist (dd/mm/yr): \_\_\_\_\_ (time) \_\_\_\_\_ ☐ Time not recorded
- ☐ Palliative (dd/mm/yr): \_\_\_\_\_ (time) \_\_\_\_\_ ☐ Time not recorded
- ☐ Trauma services (dd/mm/yr): \_\_\_\_\_ (time) \_\_\_\_\_ ☐ Time not recorded
- ☐ Stroke services (dd/mm/yr): \_\_\_\_\_ (time) \_\_\_\_\_ ☐ Time not recorded
- ☐ Cardiology (dd/mm/yr): \_\_\_\_\_ (time) \_\_\_\_\_ ☐ Time not recorded
- ☐ Neurosurgery (dd/mm/yr): \_\_\_\_\_ (time) \_\_\_\_\_ ☐ Time not recorded
- ☐ Orthopaedics (dd/mm/yr): \_\_\_\_\_ (time) \_\_\_\_\_ ☐ Time not recorded
- ☐ Intensive Care (dd/mm/yr): \_\_\_\_\_ (time) \_\_\_\_\_ ☐ Time not recorded
- ☐ Gerontology (dd/mm/yr): \_\_\_\_\_ (time) \_\_\_\_\_ ☐ Time not recorded
- ☐ Transition Nurse/Discharge Planner (dd/mm/yr): \_\_\_\_\_ (time) \_\_\_\_\_ ☐ Time not recorded
- ☐ Other (dd/mm/yr): \_\_\_\_\_ (time) \_\_\_\_\_ ☐ Time not recorded

### 10. What diagnostic tests were conducted?

☐ None, go to question 11.

### T3 TOOL - ED Tracking Sheet

- ☐ X-rays (dd/mm/yr): \_\_\_\_\_ (time) \_\_\_\_\_ ☐ Time not recorded  
Location(s) \_\_\_\_\_
- ☐ Urine (dd/mm/yr): \_\_\_\_\_ (time) \_\_\_\_\_ ☐ Time not recorded
- ☐ CAT scan (dd/mm/yr): \_\_\_\_\_ (time) \_\_\_\_\_ ☐ Time not recorded  
Location(s) \_\_\_\_\_
- ☐ MRI (dd/mm/yr): \_\_\_\_\_ (time) \_\_\_\_\_ ☐ Time not recorded  
Location(s) \_\_\_\_\_
- ☐ Lab Work(dd/mm/yr): \_\_\_\_\_ (time) \_\_\_\_\_ ☐ Time not recorded
- ☐ Ultrasound (dd/mm/yr): \_\_\_\_\_ (time) \_\_\_\_\_ ☐ Time not recorded
- ☐ Other (*specify*): \_\_\_\_\_  
☐ Time not recorded
- (dd/mm/yr): \_\_\_\_\_ (time) \_\_\_\_\_

#### 11. What procedures were performed? (*Check all that apply*)

- ☐ None, go to question 12.
- ☐ Dislocated joint reduction (dd/mm/yr): \_\_\_\_\_ (time) \_\_\_\_\_ ☐ Time not recorded
- ☐ Fracture reduction (dd/mm/yr): \_\_\_\_\_ (time) \_\_\_\_\_ ☐ Time not recorded
- ☐ Cardioversion (dd/mm/yr): \_\_\_\_\_ (time) \_\_\_\_\_ ☐ Time not recorded
- ☐ Scopes (dd/mm/yr): \_\_\_\_\_ (time) \_\_\_\_\_ ☐ Time not recorded
- ☐ Laceration Repair(dd/mm/yr): \_\_\_\_\_ (time) \_\_\_\_\_ ☐ Time not recorded
- ☐ Bladder Catheterization(dd/mm/yr): \_\_\_\_\_ (time) \_\_\_\_\_ ☐ Time not recorded
- ☐ Para/thoro-centesis (dd/mm/yr): \_\_\_\_\_ (time) \_\_\_\_\_ ☐ Time not recorded
- ☐ Other: \_\_\_\_\_ (dd/mm/yr): \_\_\_\_\_ (time) \_\_\_\_\_ ☐ Time not recorded

#### 12. Final ED diagnosis? *Specify* \_\_\_\_\_

(dd/mm/yr): \_\_\_\_\_ (time) \_\_\_\_\_ ☐ Time Not Recorded

#### 13. Disposition decision of the resident

Date and time of disposition decision: (dd/mm/yr): \_\_\_\_\_ (time) \_\_\_\_\_

Reason for disposition decision:

☐ Reason for decision not recorded ☐ Time Not Recorded

- |                                                                                                                                                                                                                                      |                                                                                                                                                                                                                                                               |
|--------------------------------------------------------------------------------------------------------------------------------------------------------------------------------------------------------------------------------------|---------------------------------------------------------------------------------------------------------------------------------------------------------------------------------------------------------------------------------------------------------------|
| <input type="checkbox"/> Admit to inpatient unit<br><input type="checkbox"/> Admit to ICU<br><input type="checkbox"/> Discharge to LTC<br><input type="checkbox"/> Transfer to another hospital<br><input type="checkbox"/> Deceased | <input type="checkbox"/> Bed in ED<br><input type="checkbox"/> Hallway/FCP<br><input type="checkbox"/> Discharge to another LTC<br><input type="checkbox"/> Discharge to care of family/friend caregiver<br><input type="checkbox"/> Other ( <i>specify</i> ) |
|--------------------------------------------------------------------------------------------------------------------------------------------------------------------------------------------------------------------------------------|---------------------------------------------------------------------------------------------------------------------------------------------------------------------------------------------------------------------------------------------------------------|

#### 14. Actual disposition of the resident

**ACTUAL disposition (dd/mm/yr):** \_\_\_\_\_ **(time)** \_\_\_\_\_ ☐ Time Not Recorded

- |                                                                                                                                                                                                 |                                                                                                                                                                                                                                                               |
|-------------------------------------------------------------------------------------------------------------------------------------------------------------------------------------------------|---------------------------------------------------------------------------------------------------------------------------------------------------------------------------------------------------------------------------------------------------------------|
| <input type="checkbox"/> Admit to inpatient unit<br><input type="checkbox"/> Admit to ICU<br><input type="checkbox"/> Discharge to LTC<br><input type="checkbox"/> Transfer to another hospital | <input type="checkbox"/> Bed in ED<br><input type="checkbox"/> Hallway/FCP<br><input type="checkbox"/> Discharge to another LTC<br><input type="checkbox"/> Discharge to care of family/friend caregiver<br><input type="checkbox"/> Other ( <i>specify</i> ) |
|-------------------------------------------------------------------------------------------------------------------------------------------------------------------------------------------------|---------------------------------------------------------------------------------------------------------------------------------------------------------------------------------------------------------------------------------------------------------------|

## T3 TOOL - ED Tracking Sheet

☐ Deceased

**15. Did the emergency department staff call the long term care centre regarding the resident's return?**

- ☐ Yes (dd/mm/yr): \_\_\_\_\_, go to question 14a. ☐ Time Not Recorded  
☐ No, go to EMS/IFT 2.  
☐ Not documented, go to EMS/IFT 2.  
☐ N/A

**a) If yes, who made the call?**

- ☐ RN ☐ LPN ☐ Clerk

**16. While the resident was in the ED, was an attempt made to contact the family/friend caregiver about the condition/disposition?**

- ☐ Yes, the attempt was successful, go to question 16  
☐ Yes, the attempt was unsuccessful, go to question 16  
☐ Not applicable, family was present, go to section III  
☐ No, not documented, go to section III

**16a. If family/friend caregiver was not present while the resident was in the ED, who notified the family/friend caregiver?**

- |                                                                                                                                                                                        |                                                                                                                                                                                              |
|----------------------------------------------------------------------------------------------------------------------------------------------------------------------------------------|----------------------------------------------------------------------------------------------------------------------------------------------------------------------------------------------|
| <input type="checkbox"/> Physician<br><input type="checkbox"/> Licensed Practical Nurse (LPN)<br><input type="checkbox"/> Manager<br><input type="checkbox"/> Resident/Medical Student | <input type="checkbox"/> Registered Nurse (RN)<br><input type="checkbox"/> Nurse Practitioner<br><input type="checkbox"/> Social Services<br><input type="checkbox"/> Other (specify): _____ |
|----------------------------------------------------------------------------------------------------------------------------------------------------------------------------------------|----------------------------------------------------------------------------------------------------------------------------------------------------------------------------------------------|

☐ Notes \_\_\_\_\_

### III - ED Quality Indicators

- 1. How many adult patients were in the waiting room/triage of the Emergency Department when the resident arrived?** \_\_\_\_\_  
**Total # of adults in the Emergency Department when the resident arrived** \_\_\_\_\_

- 2. How many adults were assessed with CTAS scores of Level 1 and Level 2 at the time the resident arrived in the ED?**

#1 \_\_\_\_\_

#2 \_\_\_\_\_

- 3. # of patients admitted but waiting in the Emergency Department for a bed to become available in an inpatient unit.** \_\_\_\_\_

☐ Notes \_\_\_\_\_

### IV- Data collected from Quality Perception Questions Asked of the Emergency Department Bedside RN

- ☐ Declined to participate  
☐ Could not recall transfer  
☐ Could not contact/locate HCP

**1. Do you think the transfer could have been avoided?**

- ☐ Yes, go to question 1a.  
☐ No, go to question 2.

## T3 TOOL - ED Tracking Sheet

### a) If yes, what do you think could have been done to avoid the transfer

- |                                                                                                                                                                                                                                                                                                                                            |                                                                                                                                                                                                 |
|--------------------------------------------------------------------------------------------------------------------------------------------------------------------------------------------------------------------------------------------------------------------------------------------------------------------------------------------|-------------------------------------------------------------------------------------------------------------------------------------------------------------------------------------------------|
| <input type="checkbox"/> Access to required equipment<br><input type="checkbox"/> Access to adequate resources (e.g. staffing levels, Information [i.e. knowing the resident well enough/having enough information to determine their need for care])<br><input type="checkbox"/> Family not insisting on transfer to emergency department | <input type="checkbox"/> Access to required services<br><input type="checkbox"/> Dr. examine the resident while still in the long term care centre<br><input type="checkbox"/> Others (specify) |
|--------------------------------------------------------------------------------------------------------------------------------------------------------------------------------------------------------------------------------------------------------------------------------------------------------------------------------------------|-------------------------------------------------------------------------------------------------------------------------------------------------------------------------------------------------|

**Please state how much you agree or disagree with the following statements.**

### 2. You received sufficient written information to provide care for the resident during their time at the emergency department.

|                                              |                                     |                                       |                                        |                                                 |
|----------------------------------------------|-------------------------------------|---------------------------------------|----------------------------------------|-------------------------------------------------|
| Strongly Agree<br><input type="checkbox"/> 1 | Agree<br><input type="checkbox"/> 2 | Neutral<br><input type="checkbox"/> 3 | Disagree<br><input type="checkbox"/> 4 | Strongly Disagree<br><input type="checkbox"/> 5 |
|----------------------------------------------|-------------------------------------|---------------------------------------|----------------------------------------|-------------------------------------------------|

### 3. You received sufficient verbal information to provide care for the resident during their time at the emergency department.

|                                              |                                     |                                       |                                        |                                                 |
|----------------------------------------------|-------------------------------------|---------------------------------------|----------------------------------------|-------------------------------------------------|
| Strongly Agree<br><input type="checkbox"/> 1 | Agree<br><input type="checkbox"/> 2 | Neutral<br><input type="checkbox"/> 3 | Disagree<br><input type="checkbox"/> 4 | Strongly Disagree<br><input type="checkbox"/> 5 |
|----------------------------------------------|-------------------------------------|---------------------------------------|----------------------------------------|-------------------------------------------------|

### 4. You were clear on the exact nature of the resident's problem based on all the communication provided.

|                                              |                                     |                                       |                                        |                                                 |
|----------------------------------------------|-------------------------------------|---------------------------------------|----------------------------------------|-------------------------------------------------|
| Strongly Agree<br><input type="checkbox"/> 1 | Agree<br><input type="checkbox"/> 2 | Neutral<br><input type="checkbox"/> 3 | Disagree<br><input type="checkbox"/> 4 | Strongly Disagree<br><input type="checkbox"/> 5 |
|----------------------------------------------|-------------------------------------|---------------------------------------|----------------------------------------|-------------------------------------------------|

☐ Notes \_\_\_\_\_

| <b>T3 TOOL - Inpatient Tracking Sheet</b>                                                                                                                                                                                                                                                                                                                                                                                                                                                                                                                                                                                                                                                                                                                                                                                                                                                                                                                                                                                                                                             |  |
|---------------------------------------------------------------------------------------------------------------------------------------------------------------------------------------------------------------------------------------------------------------------------------------------------------------------------------------------------------------------------------------------------------------------------------------------------------------------------------------------------------------------------------------------------------------------------------------------------------------------------------------------------------------------------------------------------------------------------------------------------------------------------------------------------------------------------------------------------------------------------------------------------------------------------------------------------------------------------------------------------------------------------------------------------------------------------------------|--|
| Date of data collection (dd/mm/yr): _____                                                                                                                                                                                                                                                                                                                                                                                                                                                                                                                                                                                                                                                                                                                                                                                                                                                                                                                                                                                                                                             |  |
| <b>Data collected from charts, patient care records and EDIS (Edmonton)</b>                                                                                                                                                                                                                                                                                                                                                                                                                                                                                                                                                                                                                                                                                                                                                                                                                                                                                                                                                                                                           |  |
| <b><u>I – Resident related information</u></b>                                                                                                                                                                                                                                                                                                                                                                                                                                                                                                                                                                                                                                                                                                                                                                                                                                                                                                                                                                                                                                        |  |
| <b>1. Time resident transferred from inpatient hallway to bed.</b><br>(dd/mm/yr): _____ (time) _____ <input type="checkbox"/> N/A <input type="checkbox"/> Time Not Recorded                                                                                                                                                                                                                                                                                                                                                                                                                                                                                                                                                                                                                                                                                                                                                                                                                                                                                                          |  |
| <b>2. Resident admitted to which unit:</b>                                                                                                                                                                                                                                                                                                                                                                                                                                                                                                                                                                                                                                                                                                                                                                                                                                                                                                                                                                                                                                            |  |
| <b>3. Patient admitted to which program:</b>                                                                                                                                                                                                                                                                                                                                                                                                                                                                                                                                                                                                                                                                                                                                                                                                                                                                                                                                                                                                                                          |  |
| <input type="checkbox"/> Notes _____                                                                                                                                                                                                                                                                                                                                                                                                                                                                                                                                                                                                                                                                                                                                                                                                                                                                                                                                                                                                                                                  |  |
| <b><u>II – Inpatient setting and transfer related information</u></b>                                                                                                                                                                                                                                                                                                                                                                                                                                                                                                                                                                                                                                                                                                                                                                                                                                                                                                                                                                                                                 |  |
| <b>1- Which belongings accompanied the resident?(Check all that apply)</b><br><div style="display: flex; justify-content: space-between;"> <div style="width: 45%;"> <input type="checkbox"/> Not recorded<br/> <input type="checkbox"/> Clothing<br/> <input type="checkbox"/> Medications<br/> <input type="checkbox"/> Slippers<br/> <input type="checkbox"/> Hearing aid<br/> <input type="checkbox"/> Other (specify): _____             </div> <div style="width: 45%;"> <input type="checkbox"/> Glasses<br/> <input type="checkbox"/> Dentures<br/> <input type="checkbox"/> Health care card<br/> <input type="checkbox"/> Cane/Walker<br/> <input type="checkbox"/> Jewelry             </div> </div>                                                                                                                                                                                                                                                                                                                                                                       |  |
| <b>2- Was the documentation prepared by LTC/IFT/EMS/ED given to the Inpatient unit?</b><br><input type="checkbox"/> Yes, go to question 2a.<br><input type="checkbox"/> No, go to question 3.                                                                                                                                                                                                                                                                                                                                                                                                                                                                                                                                                                                                                                                                                                                                                                                                                                                                                         |  |
| <b>a) If yes, which documentation(s) below was included? (Check all that apply)</b><br><div style="display: flex; justify-content: space-between;"> <div style="width: 45%;"> <input type="checkbox"/> Patient Care Plan<br/> <input type="checkbox"/> DNR order<br/> <input type="checkbox"/> Record of Allergy<br/> <input type="checkbox"/> PCR form<br/> <input type="checkbox"/> Other(specify): _____             </div> <div style="width: 45%;"> <input type="checkbox"/> Advance Directive<br/> <input type="checkbox"/> Medication list<br/> <input type="checkbox"/> Patient Summary Leading to Transfer<br/> <input type="checkbox"/> Advanced Fax Report<br/> <input type="checkbox"/> Patient Transfer Information Sheet<br/> <input type="checkbox"/> ED Outpatient Record<br/> <input type="checkbox"/> ED Nurse's Notes<br/> <input type="checkbox"/> Test results from ED<br/> <input type="checkbox"/> Physician's Record of Assessment<br/> <input type="checkbox"/> ED Triage Form<br/> <input type="checkbox"/> ED Physician's Orders             </div> </div> |  |
| <b>3- Was the resident transferred to Operation Room (OR) theatre?</b><br><input type="checkbox"/> Yes, go to question 3a.<br><input type="checkbox"/> No, go to Section III.                                                                                                                                                                                                                                                                                                                                                                                                                                                                                                                                                                                                                                                                                                                                                                                                                                                                                                         |  |



## T3 TOOL - Inpatient Tracking Sheet

|                                                                                                                                                                                                                                                                                       |  |
|---------------------------------------------------------------------------------------------------------------------------------------------------------------------------------------------------------------------------------------------------------------------------------------|--|
| a) If yes, what was the surgical procedure?                                                                                                                                                                                                                                           |  |
| <input type="checkbox"/> Notes _____                                                                                                                                                                                                                                                  |  |
| <b>III – Transfer-time related information</b>                                                                                                                                                                                                                                        |  |
| <b>1. Arrival on Inpatient Unit (dd/mm/yr): _____ (time) _____</b><br><input type="checkbox"/> Time Not Recorded                                                                                                                                                                      |  |
| <b>2. Actual disposition of the resident:</b>                                                                                                                                                                                                                                         |  |
| <input type="checkbox"/> Transfer to another inpatient unit in same hospital (dd/mm/yr): _____ (time) _____ <input type="checkbox"/> Time Not Recorded                                                                                                                                |  |
| <input type="checkbox"/> Sent to another hospital unit or facility (dd/mm/yr): _____ (time) _____ <input type="checkbox"/> Time Not Recorded                                                                                                                                          |  |
| <input type="checkbox"/> Resident returned to LTC (dd/mm/yr): _____ (time) _____ <input type="checkbox"/> Time Not Recorded                                                                                                                                                           |  |
| <input type="checkbox"/> Returned to another LTC (dd/mm/yr): _____ (time) _____ <input type="checkbox"/> Time Not Recorded                                                                                                                                                            |  |
| <input type="checkbox"/> Discharged in care of family/friend (dd/mm/yr): _____ (time) _____ <input type="checkbox"/> Time Not Recorded                                                                                                                                                |  |
| <input type="checkbox"/> Deceased on (dd/mm/yr): _____ (time) _____ <input type="checkbox"/> Time Not Recorded                                                                                                                                                                        |  |
| <b>3. Did the inpatient staff call the long term care centre regarding the resident's return?</b><br><input type="checkbox"/> Yes (dd/mm/yr): _____, go to question 3a.<br><input type="checkbox"/> No, go to EMS/IFT 2.<br><input type="checkbox"/> Not documented, go to EMS/IFT 2. |  |
| <b>a) If yes, who made the call?</b><br><input type="checkbox"/> RN<br><input type="checkbox"/> LPN<br><input type="checkbox"/> Clerk                                                                                                                                                 |  |
| <input type="checkbox"/> Notes _____                                                                                                                                                                                                                                                  |  |

**T3 TOOL - Disposition Tracking Sheet <sup>1</sup>**

Date of data collection (dd/mm/yr): \_\_\_\_\_

**Data collected from charts, patient care records and EDIS (Edmonton)**

**I – Resident related information**

**1. Primary cause of death as recorded on patient care plan:**

**2. Setting where death occurred**

- ☐ IFT/EMS/MV
- ☐ ED
- ☐ Hospital
- ☐ Other (*specify*):

**3. Date of death (dd/mm/yr): \_\_\_\_\_ (time) \_\_\_\_\_**

☐ Time Not Recorded

☐ Notes \_\_\_\_\_

<sup>1</sup> Death while in care of IFT/EMS/MV, ED, or Inpatient

**T3 EMS/IFT - 2**

Date of data collection (dd/mm/yr): \_\_\_\_\_

**I – Resident related information**

**1. Which belongings accompanied the resident? (Check all that apply)**

- |                                                 |                                           |
|-------------------------------------------------|-------------------------------------------|
| <input type="checkbox"/> Not recorded           | <input type="checkbox"/> Glasses          |
| <input type="checkbox"/> Clothing               | <input type="checkbox"/> Dentures         |
| <input type="checkbox"/> Medications            | <input type="checkbox"/> Health care card |
| <input type="checkbox"/> Slippers               | <input type="checkbox"/> Cane/Walker      |
| <input type="checkbox"/> Hearing aid            | <input type="checkbox"/> Jewellery        |
| <input type="checkbox"/> Other (specify): _____ |                                           |

**2. Was documentation prepared by ED/or inpatient unit sent with the resident? (Check all that apply)**

- ☐ Yes, go to question 2a. ☐ No, go to question 3.

**a) If yes, what documentation?**

- ☐ Inpatient summary  
☐ ED summary  
☐ Transfer record  
☐ Other (specify) \_\_\_\_\_

**3. Was the list of medications on paramedic examinations the same as the one provided by inpatient unit or the ED?**

- ☐ Yes, go to question 4.  
☐ No, go to question 3a.  
☐ N/A no medication list provided by inpatient unit or ED.

**a) If no, what is the discrepancy? (specify):** \_\_\_\_\_

☐ Notes \_\_\_\_\_

**II – IFT/EMS Pre-hospital setting and transfer related information**

**1. Number of responding IFT/EMS/MV Personnel**

- ☐ One ☐ Two

**2. What type of transportation was provided?**

- |                                                             |                                                           |
|-------------------------------------------------------------|-----------------------------------------------------------|
| <input type="checkbox"/> Inter-facility transfer (IFT)      | <input type="checkbox"/> Emergency Medical Services (EMS) |
| <input type="checkbox"/> Medi-Van (MV)                      | <input type="checkbox"/> Transport Bus                    |
| <input type="checkbox"/> Accessible Transit Service or Taxi | <input type="checkbox"/> Family/friend caregiver car      |
| <input type="checkbox"/> Other (specify): _____             |                                                           |

☐ Notes \_\_\_\_\_

**III– Transfer-time related information**

**1. Arrival time of IFT/EMS/MV at Inpatient/ED (dd/mm/yr): \_\_\_\_\_ (time) \_\_\_\_\_**

**2. Departure from the Inpatient/ED (dd/mm/yr): \_\_\_\_\_ (time) \_\_\_\_\_**

**3. Arrival place and time**

| T3 EMS/IFT - 2                                                                                                                                                                                                        |                          |
|-----------------------------------------------------------------------------------------------------------------------------------------------------------------------------------------------------------------------|--------------------------|
| <input type="checkbox"/> Arrival at <i>original</i> LTC on (dd/mm/yr): _____ (time) _____                                                                                                                             |                          |
| <input type="checkbox"/> Arrival at <i>another</i> LTC on (dd/mm/yr): _____ (time) _____                                                                                                                              | The name of another LTC: |
| <input type="checkbox"/> Notes _____                                                                                                                                                                                  |                          |
| <b>IV- Data collected from Quality Perception Questions Asked of one of the EMS/IFT Responders</b>                                                                                                                    |                          |
| <input type="checkbox"/> Declined to participate<br><input type="checkbox"/> Could not recall transfer<br><input type="checkbox"/> Could not contact/locate HCP                                                       |                          |
| <b>Please state how much you agree or disagree with the following statements.</b>                                                                                                                                     |                          |
| <b>1. You received sufficient written information to provide care for the resident during transfer back to the long term care centre.</b>                                                                             |                          |
| Strongly Agree      Agree      Neutral      Disagree      Strongly Disagree<br><input type="checkbox"/> 1 <input type="checkbox"/> 2 <input type="checkbox"/> 3 <input type="checkbox"/> 4 <input type="checkbox"/> 5 |                          |
| <b>2. You received sufficient verbal information to provide care for the resident during transfer back to the long term care centre.</b>                                                                              |                          |
| Strongly Agree      Agree      Neutral      Disagree      Strongly Disagree<br><input type="checkbox"/> 1 <input type="checkbox"/> 2 <input type="checkbox"/> 3 <input type="checkbox"/> 4 <input type="checkbox"/> 5 |                          |
| <b>3. You were clear on the exact nature of the resident's problem based on all the communication provided.</b>                                                                                                       |                          |
| Strongly Agree      Agree      Neutral      Disagree      Strongly Disagree<br><input type="checkbox"/> 1 <input type="checkbox"/> 2 <input type="checkbox"/> 3 <input type="checkbox"/> 4 <input type="checkbox"/> 5 |                          |
| <input type="checkbox"/> Notes _____                                                                                                                                                                                  |                          |

**T3 TOOL - LTC Facility Tracking Sheet - 2**

Date of data collection (dd/mm/yr): \_\_\_\_\_

**Data collected from charts, patient care records and EDIS (Edmonton)**

**I – Resident related information**

**1. On return to the facility, did LTC staff conduct a clinical assessment of the resident?**

- ☐ Yes, when?(dd/mm/yr) \_\_\_\_\_(time) \_\_\_\_\_  
☐ Day (7:00-15:00) ☐ Evening (15:00-23:00) ☐ Night (23:00-7:00)  
☐ No  
☐ Not documented

**2. Which belongings accompanied the resident?(Check all that apply)**

- |                                                 |                                           |
|-------------------------------------------------|-------------------------------------------|
| <input type="checkbox"/> Not recorded           | <input type="checkbox"/> Glasses          |
| <input type="checkbox"/> Clothing               | <input type="checkbox"/> Dentures         |
| <input type="checkbox"/> Medications            | <input type="checkbox"/> Health care card |
| <input type="checkbox"/> Slippers               | <input type="checkbox"/> Cane/Walker      |
| <input type="checkbox"/> Hearing aid            | <input type="checkbox"/> Jewellery        |
| <input type="checkbox"/> Other (specify): _____ |                                           |

**3. Was the Inpatient/ED history received?**

- ☐ Yes ☐ No

**4. What documents was sent by the ED/Inpatient unit to the LTC?**

- |                                            |                                                 |
|--------------------------------------------|-------------------------------------------------|
| <input type="checkbox"/> Patient Care Plan | <input type="checkbox"/> Advance Directive      |
| <input type="checkbox"/> DNR order         | <input type="checkbox"/> Medication list        |
| <input type="checkbox"/> Record of Allergy | <input type="checkbox"/> PCR form               |
| <input type="checkbox"/> Inpatient summary | <input type="checkbox"/> Transfer record        |
| <input type="checkbox"/> ED summary        | <input type="checkbox"/> Other (specify): _____ |

**5. Were discharge instructions received?**

- ☐ Yes, in writing, go to question 5a.  
☐ Yes, by telephone, go to question 5a.  
☐ No, go to question 6.  
☐ Not documented

**a) Did the discharge instructions include any of the following? (Check all that apply)**

- ☐ Details of diagnosis  
☐ Details of management plans for follow-up  
☐ Discharge vitals

**6. Was the medication reconciliation performed by the facility?**

- ☐ Yes, go question 6a.  
☐ No, go to Section II.  
☐ Not documented  
☐ N/A, specify \_\_\_\_\_

**a) If yes, were any changes identified?**

- ☐ Yes, specify any differences \_\_\_\_\_  
☐ No

## T3 TOOL - LTC Facility Tracking Sheet - 2

☐ Notes \_\_\_\_\_

### **II– Facility setting related information**

**1. Was the family/friend caregiver informed that the resident returned to the LTC?**

- |                                                             |                                                                                                                      |
|-------------------------------------------------------------|----------------------------------------------------------------------------------------------------------------------|
| <input type="checkbox"/> Yes<br><input type="checkbox"/> No | <input type="checkbox"/> Not documented<br><input type="checkbox"/> Not applicable since no family/friend /Caregiver |
|-------------------------------------------------------------|----------------------------------------------------------------------------------------------------------------------|

**2. Was the resident's physician informed that the resident returned to the LTC?**

- ☐ Yes      ☐ No      ☐ Not documented

☐ Notes \_\_\_\_\_

### **III– Transfer -time related information**

**1. Time family/friend caregiver informed (dd/mm/yr): \_\_\_\_\_ (time) \_\_\_\_\_**

- ☐ Day (7:00-15:00)   ☐ Evening (15:00-23:00)   ☐ Night (23:00-7:00)

- ☐ Not applicable since no family/caregiver

**2. Time resident's physician informed (dd/mm/yr): \_\_\_\_\_ (time) \_\_\_\_\_**

**3. Arrival time of resident at facility (dd/mm/yr): \_\_\_\_\_ (time) \_\_\_\_\_**

☐ Notes \_\_\_\_\_

### **IV - IV- Data Collected from Quality Perception Questions Asked of the Long Term Care Centre Receiving RN**

- ☐ Declined to participate  
☐ Could not recall the transfer  
☐ Could not contact/locate HCP

**1. Was it difficult to provide for the resident's discharge needs when they returned to the long term care centre?**

- ☐ Yes, go question 1a.  
☐ No, go to question 2.

**a) If yes, what aspect(s) made it difficult? (Check all that apply)**

- |                                                                                                                                                                                         |                                                                                                                                                                 |
|-----------------------------------------------------------------------------------------------------------------------------------------------------------------------------------------|-----------------------------------------------------------------------------------------------------------------------------------------------------------------|
| <input type="checkbox"/> Time of arrival<br><input type="checkbox"/> Unable to access required services (e.g. pharmacy)<br><input type="checkbox"/> Had insufficient staffing resources | <input type="checkbox"/> Legibility of Instructions<br><input type="checkbox"/> Unable to access required equipment<br><input type="checkbox"/> Other (specify) |
|-----------------------------------------------------------------------------------------------------------------------------------------------------------------------------------------|-----------------------------------------------------------------------------------------------------------------------------------------------------------------|

**2. Did the resident returned from the ED with a change in cognitive status?**

- ☐ Yes      ☐ No

**a) If yes, did the resident's condition**

- ☐ Improve      ☐ Deteriorate

**3. Did the resident return with any new skin injuries/changes?**

- ☐ Yes      ☐ No

**Please state how much you agree or disagree with the following statements.**

**4. You received sufficient written information to resume care for the resident.**

- Strongly Agree      Agree      Neutral      Disagree      Strongly Disagree  
☐ 1      ☐ 2      ☐ 3      ☐ 4      ☐ 5

**5. You received sufficient verbal information to resume care for the resident.**

### T3 TOOL - LTC Facility Tracking Sheet - 2

|                                              |                                     |                                       |                                        |                                                 |                              |
|----------------------------------------------|-------------------------------------|---------------------------------------|----------------------------------------|-------------------------------------------------|------------------------------|
| Strongly Agree<br><input type="checkbox"/> 1 | Agree<br><input type="checkbox"/> 2 | Neutral<br><input type="checkbox"/> 3 | Disagree<br><input type="checkbox"/> 4 | Strongly Disagree<br><input type="checkbox"/> 5 | <input type="checkbox"/> N/A |
|----------------------------------------------|-------------------------------------|---------------------------------------|----------------------------------------|-------------------------------------------------|------------------------------|

**6. You were clear about the changes to the resident's care plan based on all the communication received.**

|                                              |                                     |                                       |                                        |                                                 |
|----------------------------------------------|-------------------------------------|---------------------------------------|----------------------------------------|-------------------------------------------------|
| Strongly Agree<br><input type="checkbox"/> 1 | Agree<br><input type="checkbox"/> 2 | Neutral<br><input type="checkbox"/> 3 | Disagree<br><input type="checkbox"/> 4 | Strongly Disagree<br><input type="checkbox"/> 5 |
|----------------------------------------------|-------------------------------------|---------------------------------------|----------------------------------------|-------------------------------------------------|

**7. The resident returned to the level of function prior to the transfer.**

|                                              |                                     |                                       |                                        |                                                 |
|----------------------------------------------|-------------------------------------|---------------------------------------|----------------------------------------|-------------------------------------------------|
| Strongly Agree<br><input type="checkbox"/> 1 | Agree<br><input type="checkbox"/> 2 | Neutral<br><input type="checkbox"/> 3 | Disagree<br><input type="checkbox"/> 4 | Strongly Disagree<br><input type="checkbox"/> 5 |
|----------------------------------------------|-------------------------------------|---------------------------------------|----------------------------------------|-------------------------------------------------|

**8. You had a meaningful exchange of information with the transport people about the medical condition and treatments the resident received while in the emergency department or hospital. (Prompt: conversation)**

|                                              |                                     |                                       |                                        |                                                 |
|----------------------------------------------|-------------------------------------|---------------------------------------|----------------------------------------|-------------------------------------------------|
| Strongly Agree<br><input type="checkbox"/> 1 | Agree<br><input type="checkbox"/> 2 | Neutral<br><input type="checkbox"/> 3 | Disagree<br><input type="checkbox"/> 4 | Strongly Disagree<br><input type="checkbox"/> 5 |
|----------------------------------------------|-------------------------------------|---------------------------------------|----------------------------------------|-------------------------------------------------|

☐ Notes \_\_\_\_\_
